# Supplementary material
Source: PubMed Central journal article supplement (PMC4630114)
Supplement: NIHMS714703-supplement-1.pdf [file NIHMS714703-supplement-1.pdf]

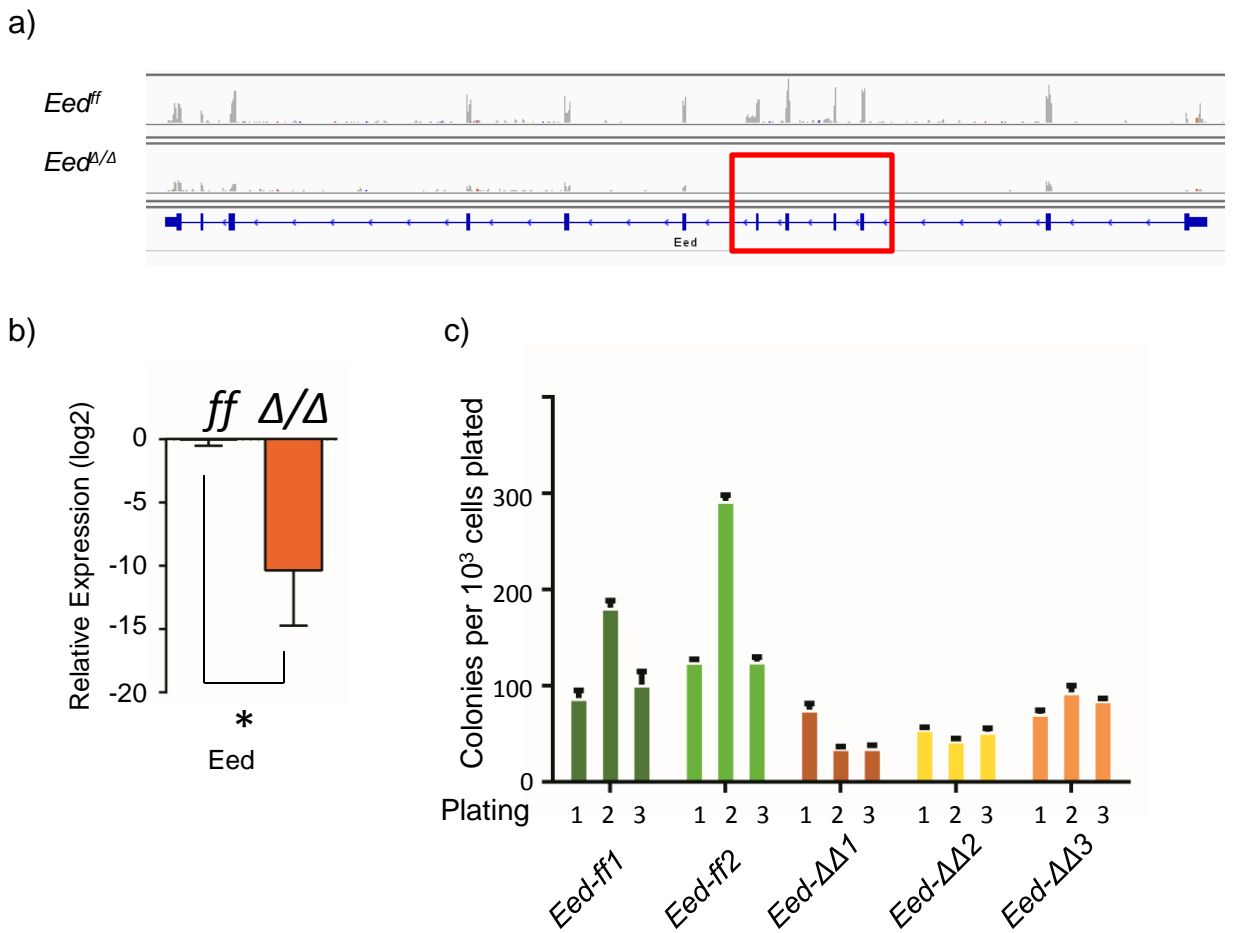

**Fig. S1** a) RNAseq track (visualized using Integrated Genome Viewer) of *Eed* locus in *MLL-AF9* transduced *Eed<sup>ff</sup>/Cdkn2a<sup>ko</sup>* and *Eed<sup>Δ/Δ</sup>/Cdkn2a<sup>ko</sup>* cells. Excised floxed Exons E3-E6 in *Eed<sup>Δ/Δ</sup>* cells are highlighted (red rectangle). b) Excision of floxed exons was confirmed by RT-qPCR in *Eed<sup>ff</sup>* (n=2) and *Eed<sup>Δ/Δ</sup>* (n=4) *MLL-AF9* clones. Error bars indicate SD. \* p<0.05. c) CFC per 1000 cells plated for 2 *Eed<sup>ff</sup>* *MLL-AF9* control and 3 *Eed<sup>Δ/Δ</sup>* *MLL-AF9* clones. Clones were plated in triplicate, error bars indicate SEM.
