# Supplementary material
Source: PubMed Central journal article supplement (PMC4630114)
Supplement: NIHMS714703-supplement-2.pdf [file NIHMS714703-supplement-2.pdf]

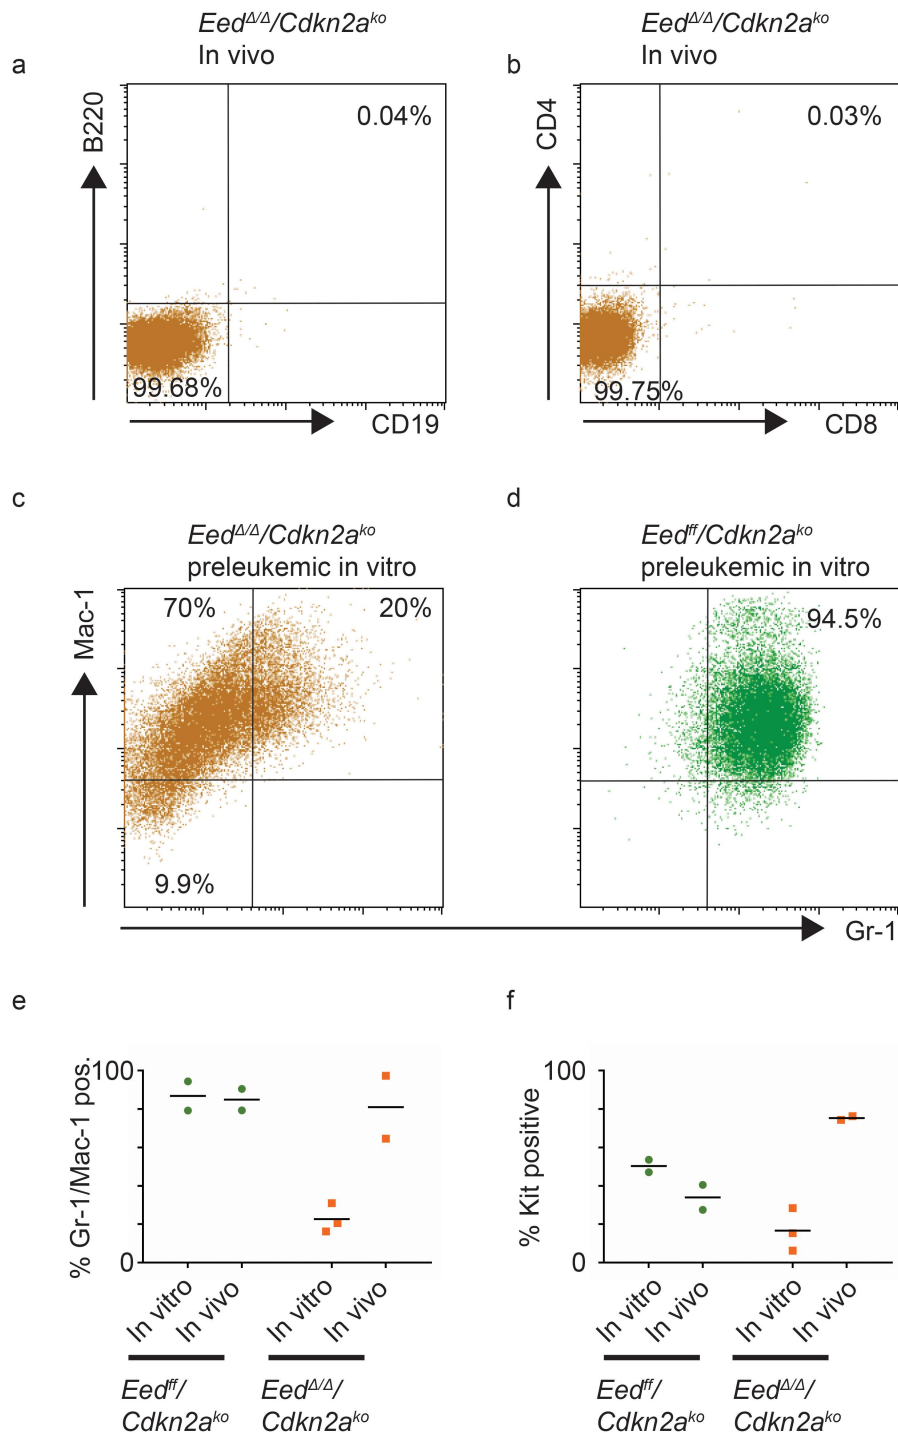

**Fig. S2: Immunophenotypic characterization of *Eed<sup>ΔΔ</sup>/Cdkn2a<sup>ko</sup>* MLL-AF9 leukemia.** *Eed* inactivation does not lead to aberrant expression of B-lineage markers B220/CD19 (a) or T-lineage markers CD4/CD8 (b) in vivo. c) Preleukemic *Eed<sup>ΔΔ</sup>/Cdkn2a<sup>ko</sup>* MLL-AF9 clones grown ex vivo show relatively low expression of Gr-1 compared to d) *Eed<sup>ff</sup>/Cdkn2a<sup>ko</sup>* MLL-AF9 clones. e) *Eed<sup>ff</sup>/Cdkn2a<sup>ko</sup>* MLL-AF9 clones have a similar proportion of Gr-1/Mac-1 double positive cells in vitro and in vivo, whereas *Eed<sup>ΔΔ</sup>/Cdkn2a<sup>ko</sup>* MLL-AF9 clones evolve during in vivo leukemogenesis to co-express Gr-1 and Mac-1 on a higher proportion of cells. See also c)-d) and Figure 2. f) *Eed<sup>ff</sup>/Cdkn2a<sup>ko</sup>* MLL-AF9 clones have a similar proportion of Kit-positive cells in vitro and in vivo, whereas *Eed<sup>ΔΔ</sup>/Cdkn2a<sup>ko</sup>* MLL-AF9 clones evolve in vivo to express a higher proportion of Kit-positive cells.
