# Supplementary material
Source: PubMed Central journal article supplement (PMC4630114)
Supplement: NIHMS714703-supplement-4.pdf [file NIHMS714703-supplement-4.pdf]

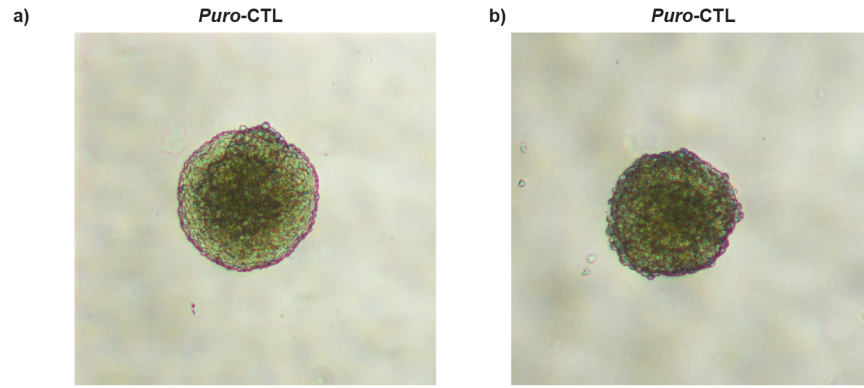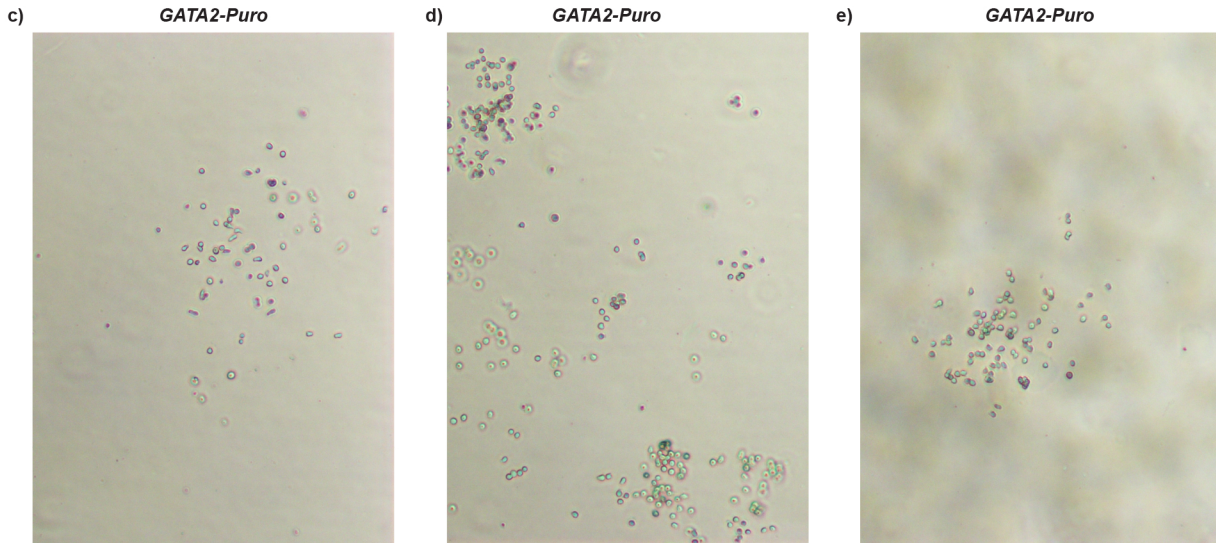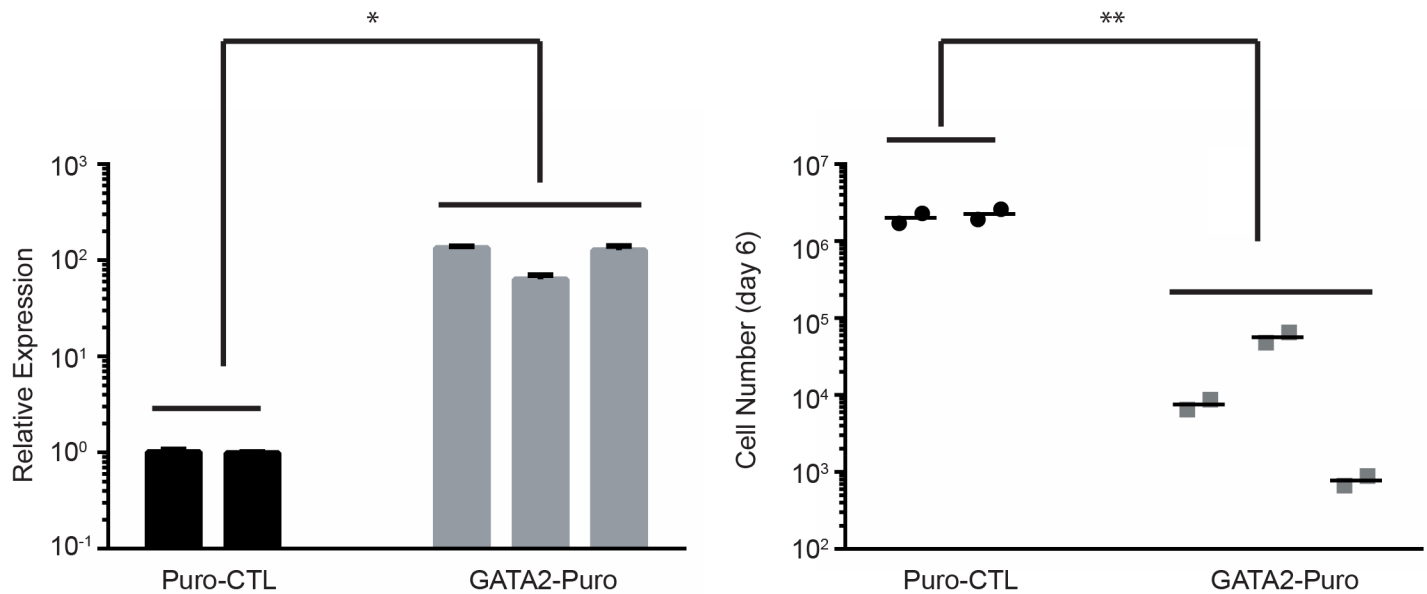

**Fig. S4: Forced high level expression of *GATA2* in *MLL-AF9* cells alters colony morphology and interferes with growth.** *Eed<sup>f/f</sup>/Cdkn2a<sup>-/-</sup>* LSK cells were co-transduced with MSCV-*MLL-AF9*-IRES-*GFP* and either MSCV-empty-pgk-*Puro* (*Puro-CTL*) or MSCV-*GATA2*-pgk-*Puro* (*GATA2-Puro*). Cells were selected in Puromycin for 48 hours after transduction and then sorted for *GFP* expression and plated in methylcellulose. Individual clones were picked, expanded and further characterized. a) and b) Two separate *Puro*-selected control clones showed the typical compact colony morphology associated with *MLL-AF9* transformed cells. c)-e) Three *GATA2*-transduced *MLL-AF9* clones with high level overexpression of *GATA2* show dispersed morphology and grow poorly ex vivo. f) Relative *GATA2* mRNA-expression levels of control-transduced *MLL-AF9* clones and *GATA2*-transduced *MLL-AF9* clones. (RT Q-PCR) g) Clones were plated in methylcellulose in duplicate with IL3, IL6 and SCF and cells were harvested and counted 6 days later. *GATA2*-transduced clones with high level overexpression lag in growth compared to control-transduced clones. \*p<0.05 \*\*p<0.01
